# Supplementary material for: CD109 Promotes Drug Resistance in A2780 Ovarian Cancer Cells by Regulating the STAT3-NOTCH1 Signaling Axis
Source: MDPI journal article supplement (doi:10.3390/ijms241210306), 2023-06-18
Supplement: s1 [file s1]

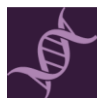

*Supplementary figures*

# CD109 Promotes Drug Resistance in A2780 Ovarian Cancer Cells by Regulating the STAT3-NOTCH1 Signaling Axis

Jun Se Kim <sup>1</sup>, Min Joo Shin <sup>1</sup>, Seo Yul Lee <sup>1</sup>, Dae Kyoung Kim <sup>2</sup>, Kyung-Un Choi <sup>3</sup>, Dong-Soo Suh <sup>4</sup>,  
Dayea Kim <sup>5</sup> and Jae Ho Kim <sup>1,\*</sup>

<sup>1</sup> Department of Physiology, School of Medicine, Pusan National University, Yangsan 50612, Republic of Korea

<sup>2</sup> Hicelltech Inc., Yangsan 50612, Republic of Korea

<sup>3</sup> Department of Pathology, School of Medicine, Pusan National University, Yangsan 50612, Republic of Korea

<sup>4</sup> Department of Obstetrics and Gynecology, School of Medicine, Pusan National University, Yangsan 50612, Republic of Korea

<sup>5</sup> New Drug Development Center, Daegu-Gyeongbuk Medical Innovation Foundation (K-MEDI hub), Daegu 41061, Republic of Korea

\* Correspondence: jhkimst@pusan.ac.kr

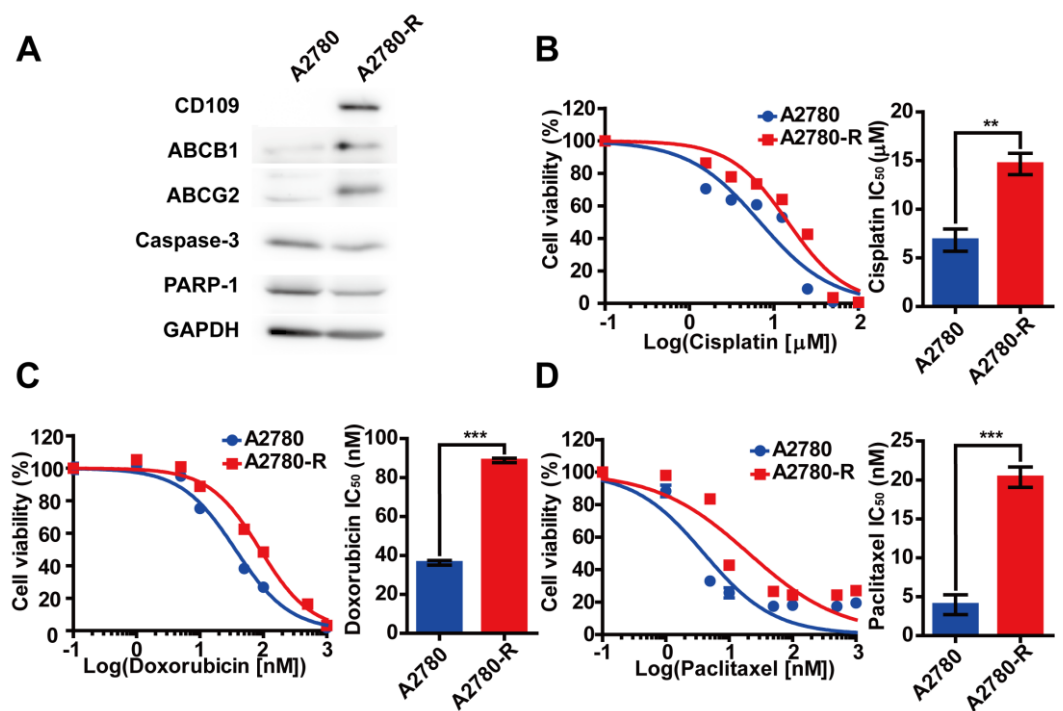

**Figure S1.** Multi-drug resistance of A2780-R cells. (A) Western blot analysis of CD109, ABC transporters (ABCB1 and ABCG2) and apoptosis markers (caspase-3 and PARP-1) in A2780 and A2780-R cells. Parental A2780 and A2780-R cells were treated with the increasing doses of cisplatin (B), doxorubicin (C), and paclitaxel (D), followed by measurement of cell viability. Bar graphs show the  $IC_{50}$  values for cisplatin, doxorubicin, and paclitaxel in A2780 and A2780-R cells (\*,  $P < 0.01$ , \*\*\*,  $P < 0.001$ ).

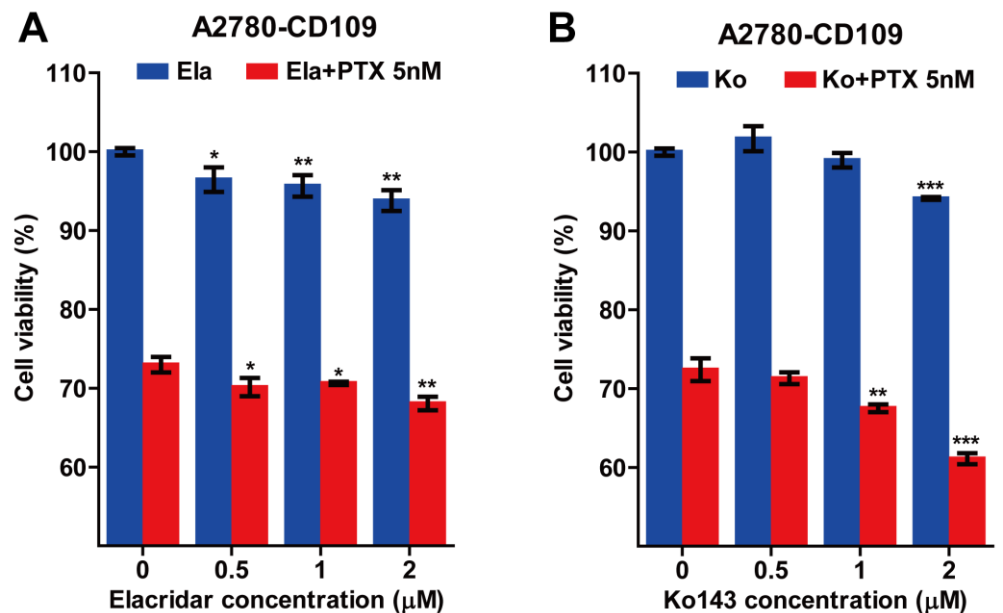

**Figure S2.** Effects of ABCB1 and ABCG2 inhibitors on resistance of CD109-overexpressed A2780 cells to paclitaxel. Dose-dependent effects of the ABCB1 inhibitor Elacridar (A) or the ABCG2 inhibitor Ko143 (B) on resistance of CD109-overexpressed A2780 cells to paclitaxel (PTX). The cells were treated with the increasing doses of Elacridar or Ko143 in the absence or the presence of 5 nM PTX, followed by measurement of cell viability. \*,  $P < 0.01$ , \*\*\*,  $P < 0.001$  vs control.

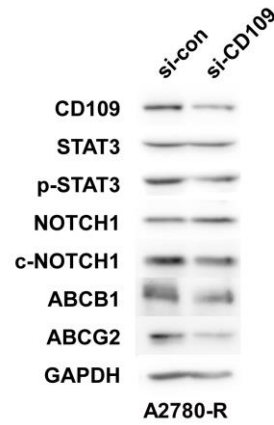

**Figure S3.** Effects of siRNA-mediated knockdown of CD109 on the STAT3-NOTCH1 signaling and the expression of ABC transporters. A2780-R cells were transfected with control siRNA (si-con) or CD109 siRNA (si-CD109), followed by western blot analysis of the STAT3-NOTCH1 signaling and the expression ABC transporters.

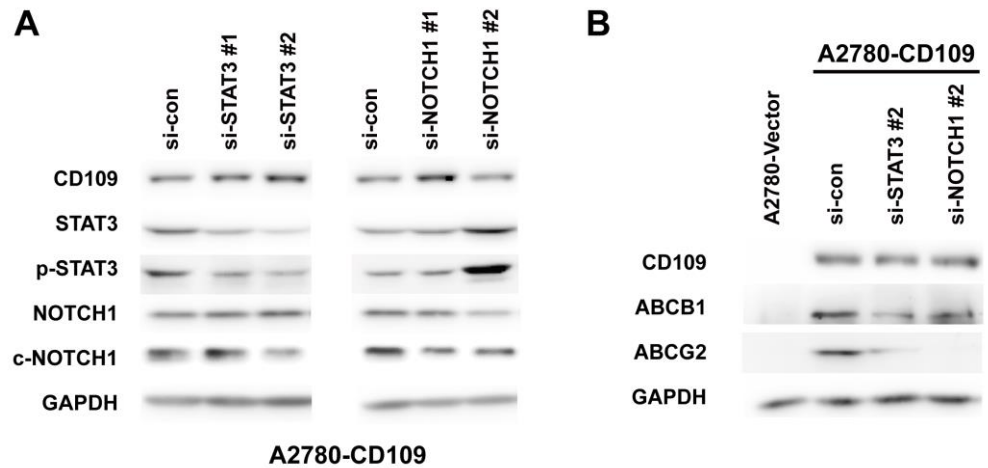

**Figure S4.** Effects of siRNA-mediated knockdown of STAT3 and NOTCH1 on the expression of ABC transporters in CD109-overexpressed A2780 cells. **(A)** Identification of siRNA clones specific to STAT3 or NOTCH1. CD109-overexpressed A2780 cells were transfected with two separate siRNA clones against STAT3 or NOTCH1, followed by Western blot analysis of STAT3 and NOTCH1 signaling. **(B)** The CD109-overexpressed A2780 cells were transfected with control siRNA, STAT3 siRNA #2 or NOTCH1 siRNA #2, followed by measurement of the expression levels of CD109, ABCB1, ABCG2, and GAPDH.

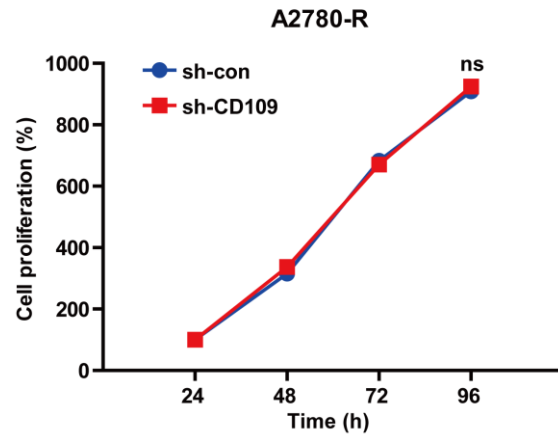

**Figure S5.** Identification of cell proliferation of A2780-R sh-con and sh-CD109 cells. CD109 knock-down showed no significance (ns) in the proliferation of A2780-R cells.
